# Supplementary material for: Electronic Characteristics, Stability and Water Oxidation Selectivity of High-Index BiVO4 Facets for Photocatalytic Application: A First Principle Study
Source: MDPI journal article supplement (doi:10.3390/nano13132023), 2023-07-07
Supplement: s1 [file s1]

## **Supplementary Materials**

# **Electronic Characteristics, Stability and Water Oxidation Selectivity of High-Index BiVO<sub>4</sub> Facets for Photocatalytic Application: A First Principle Study**

Zhiyuan Zhang <sup>1,2</sup>, Yuqi Xiang <sup>1,2</sup> and Zhihong Zhu <sup>1,2,\*</sup>

<sup>1</sup> College of Advanced Interdisciplinary Studies & Hunan Provincial Key Laboratory of Novel Nano Optoelectronic Information Materials and Devices, National University of Defense Technology, 410073 Changsha, China

<sup>2</sup> Nanhu Laser Laboratory, National University of Defense Technology, Changsha 410073, China

\* Correspondence: [zzhwcx@163.com](mailto:zzhwcx@163.com)

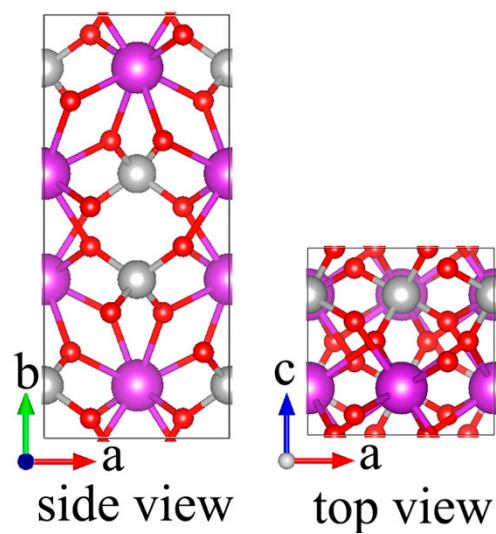

**Figure S1.** The side view and top view of  $\text{BiVO}_4$  unit cell.

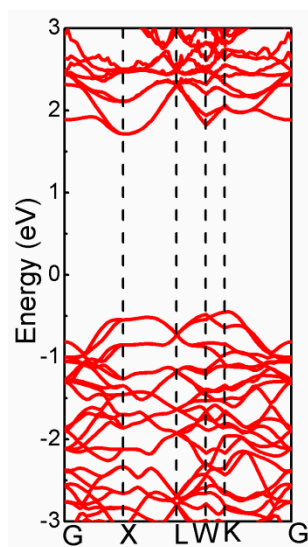

**Figure S2.** The band structure of  $\text{BiVO}_4$  unit cell.

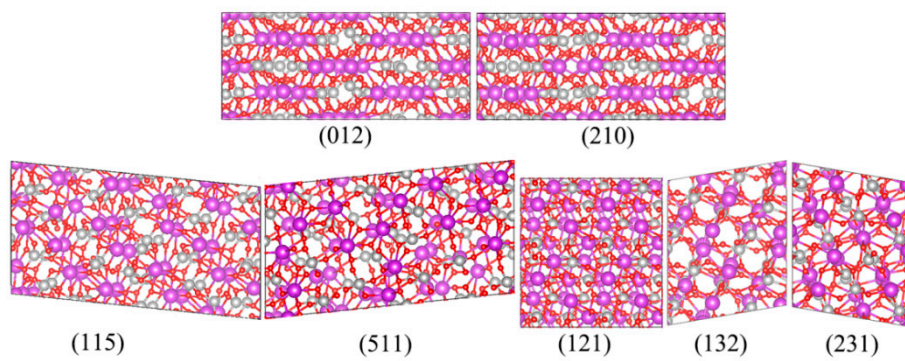

**Figure S3.** Top view of geometric structures for BiVO<sub>4</sub> with different facets.

| Facets | Thickness | Lattice parameter |          |                    | Number of atoms |    |     |
|--------|-----------|-------------------|----------|--------------------|-----------------|----|-----|
|        |           | <i>a</i>          | <i>b</i> | $\gamma$           | Bi              | V  | O   |
| (012)  | 12.87Å    | 10.33Å            | 24.16Å   | 90 <sup>0</sup>    | 40              | 40 | 160 |
| (210)  | 12.57Å    | 10.33Å            | 24.16Å   | 90 <sup>0</sup>    | 40              | 40 | 160 |
| (115)  | 12.83Å    | 12.86Å            | 24.33Å   | 84.11 <sup>0</sup> | 44              | 44 | 176 |
| (511)  | 12.64Å    | 12.86Å            | 24.33Å   | 95.88 <sup>0</sup> | 44              | 44 | 176 |
| (121)  | 14.80Å    | 13.86Å            | 14.61Å   | 90 <sup>0</sup>    | 40              | 40 | 156 |
| (132)  | 13.42Å    | 11.55Å            | 13.86Å   | 99.55 <sup>0</sup> | 28              | 26 | 104 |
| (231)  | 13.30Å    | 11.55Å            | 13.66Å   | 80.41 <sup>0</sup> | 26              | 28 | 104 |

**Table S1.** The detailed information for BiVO<sub>4</sub> with different facets. The thickness is defined by the vertical distance between the highest and lowest atoms for each structure.

| Facets | CBM (eV) | VBM (eV) |
|--------|----------|----------|
| (012)  | -5.09    | -7.08    |
| (210)  | -5.07    | -7.08    |
| (115)  | -4.70    | -6.22    |
| (511)  | -4.68    | -6.21    |
| (121)  | -4.13    | -6.21    |
| (132)  | -4.99    | -6.79    |
| (231)  | -4.95    | -6.77    |

**Table S2.** The CBM and VBM edge positions of BiVO<sub>4</sub> with different facets (vs. Vacuum).

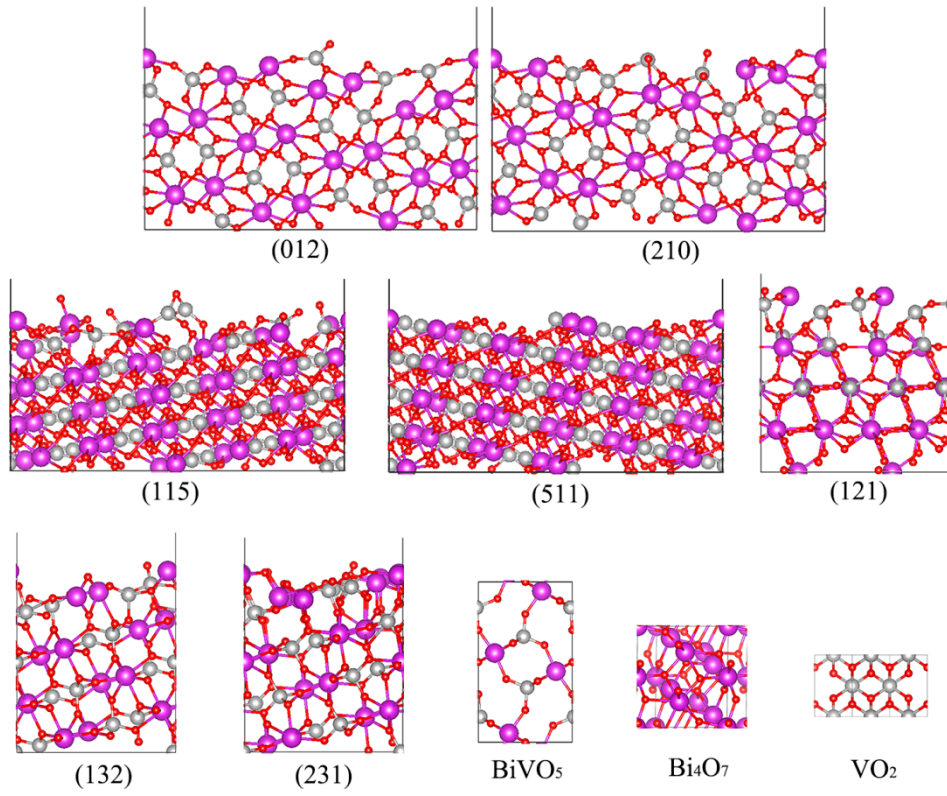

**Figure S4.** The structures for calculating  $\Delta H$ .

| Structure                      | $\Delta H$ | Ref.       |
|--------------------------------|------------|------------|
| BiVO <sub>4</sub> (012)        | -11.877    | Calculated |
| BiVO <sub>4</sub> (210)        | -11.869    | Calculated |
| BiVO <sub>4</sub> (115)        | -11.852    | Calculated |
| BiVO <sub>4</sub> (511)        | -11.863    | Calculated |
| BiVO <sub>4</sub> (121)        | -10.983    | Calculated |
| BiVO <sub>4</sub> (132)        | -12.158    | Calculated |
| BiVO <sub>4</sub> (231)        | -12.163    | Calculated |
| V <sub>2</sub> O <sub>5</sub>  | -16.071    | Handbook   |
| Bi <sub>2</sub> O <sub>3</sub> | -5.948     | Handbook   |
| VO <sub>2</sub>                | -7.551     | Calculated |
| Bi <sup>3+</sup>               | 1.270      | Handbook   |
| VO <sup>3+</sup>               | -2.010     | Handbook   |
| BiVO <sub>5</sub>              | -11.109    | Calculated |
| Bi <sub>4</sub> O <sub>7</sub> | -16.703    | Calculated |
| H <sub>2</sub> O               | -2.962     | Handbook   |

**Table S3.** Detailed information about formation enthalpy.

|     | (012)  | (115)  | (121)  | (132)  |
|-----|--------|--------|--------|--------|
| R1  | 0.201  | 0.209  | 0.499  | 0.107  |
| R2  | 0.129  | 0.154  | 1.023  | -0.152 |
| R3  | -0.299 | -0.295 | -0.121 | -0.356 |
| R4  | -0.004 | -0.001 | 0.108  | -0.039 |
| R5  | 1.704  | 1.696  | 1.406  | 1.798  |
| R6  | 1.857  | 1.852  | 1.707  | 1.902  |
| R7  | 1.865  | 1.853  | 1.418  | 2.003  |
| R8  | 0.813  | 0.763  | -0.976 | 1.375  |
| R9  | 0.384  | 0.372  | -0.063 | 0.525  |
| R10 | -0.667 | -0.719 | -2.456 | -0.107 |

**Table S4.** Calculated reduction and oxidation potentials for different reactions.

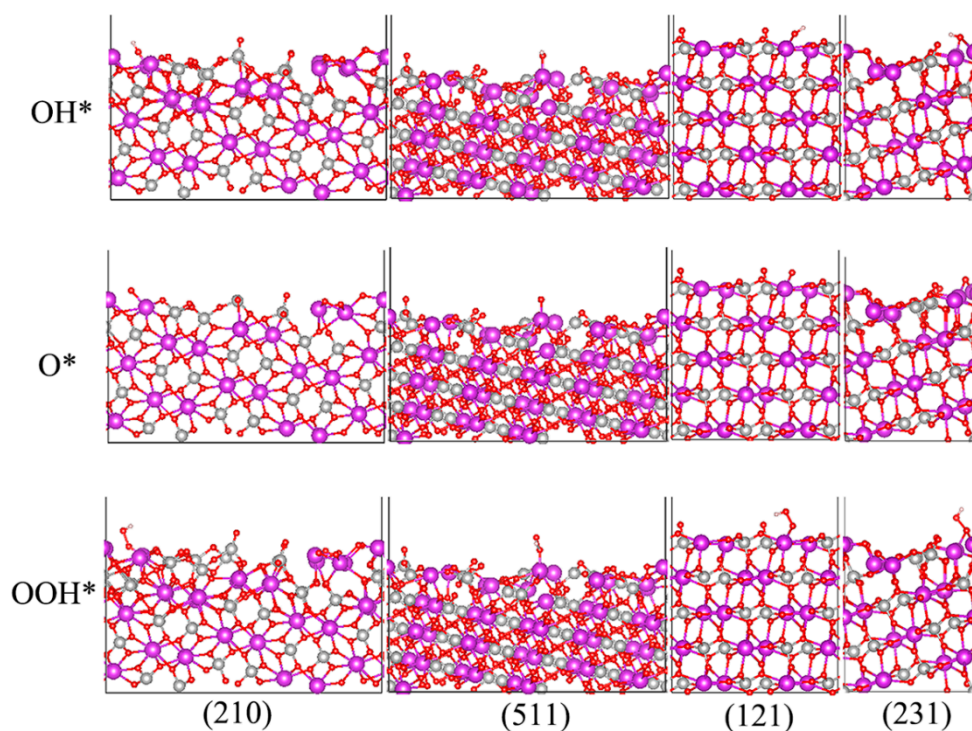

**Figure S5.** The structures of adsorbed intermediate state  $\text{OH}^*$ ,  $\text{O}^*$  and  $\text{OOH}^*$  for  $\text{BiVO}_4$  with different facets. The purple, silver, red and white spheres represent Bi, V, O and H, respectively.

| Facets | $E(\text{eV})$ | $E_{\text{slab}}(\text{eV})$ | $\Delta E_{\text{ZPE}}$ | $\Delta S(\text{eV})$ | $\Delta E_{\text{ZPE}} - T\Delta S(\text{eV})$ |
|--------|----------------|------------------------------|-------------------------|-----------------------|------------------------------------------------|
| OH*    |                |                              |                         |                       |                                                |
| (012)  | -1717.056      | -1706.922                    | 0.342                   | 0.000417              | 0.267                                          |
| (115)  | -1912.077      | -1902.376                    | 0.352                   | 0.000433              | 0.281                                          |
| (121)  | -1731.059      | -1721.304                    | 0.336                   | 0.000355              | 0.288                                          |
| (132)  | -1133.615      | -1123.791                    | 0.323                   | 0.000404              | 0.265                                          |
| O*     |                |                              |                         |                       |                                                |
| (012)  | -1712.099      | -1706.922                    | 0.046                   | 0.000315              | 0.010                                          |
| (115)  | -1906.591      | -1902.376                    | 0.051                   | 0.000271              | 0.008                                          |
| (121)  | -1725.445      | -1721.304                    | 0.042                   | 0.000291              | -0.001                                         |
| (132)  | -1128.299      | -1123.791                    | 0.027                   | 0.000365              | -0.018                                         |
| OOH*   |                |                              |                         |                       |                                                |
| (012)  | -1722.303      | -1706.922                    | 0.397                   | 0.000550              | 0.287                                          |
| (115)  | -1916.388      | -1902.376                    | 0.413                   | 0.000608              | 0.298                                          |
| (121)  | -1735.465      | -1721.304                    | 0.423                   | 0.000620              | 0.329                                          |
| (132)  | -1138.547      | -1123.791                    | 0.364                   | 0.000823              | 0.240                                          |

**Table S5.** Total energy, zero-point energy and entropy of intermediate states OH\*, O\* and OOH\* for BiVO<sub>4</sub> with different facets. (T = 300K).

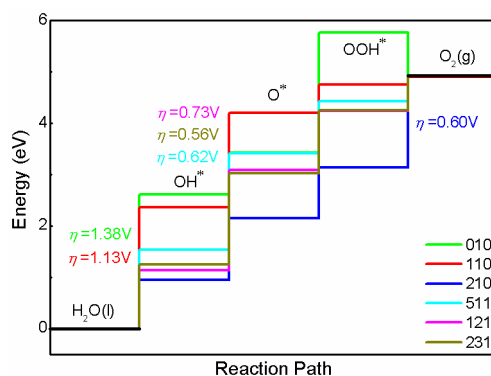

**Figure S6.** The calculated OER free energy without solvent correction for BiVO<sub>4</sub> with different facets.
